# Supplementary material for: The Plastidial Glyceraldehyde-3-Phosphate Dehydrogenase Is Critical for Abiotic Stress Response in Wheat
Source: PubMed Central journal article supplement (PMC6429432; doi:10.3390/ijms20051104), 2019-03-04
Supplement: ijms-20-01104-s001.pdf [file ijms-20-01104-s001.pdf]

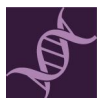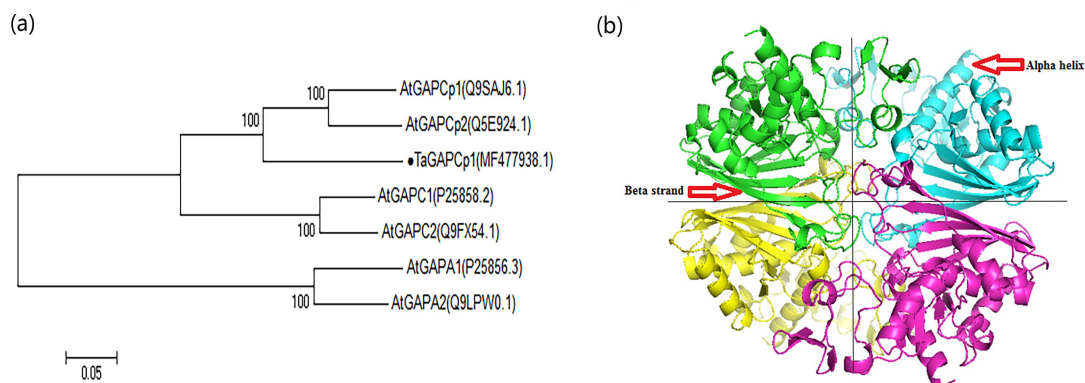

**Fig. S1 Phylogenetic analysis and structural analysis of TaGAPCp1.** (a) The phylogenetic tree was constructed with MEGA6.0 using the neighbor-joining(NJ) method. Numbers above or below branches of the tree indicate bootstrap values. The values in parentheses represent the accession number of GAPDH. (b) The spiral portion is Alpha helix and the arrow portion is Beta strand. Alpha helix account for 25% and Beta strand account for 30%

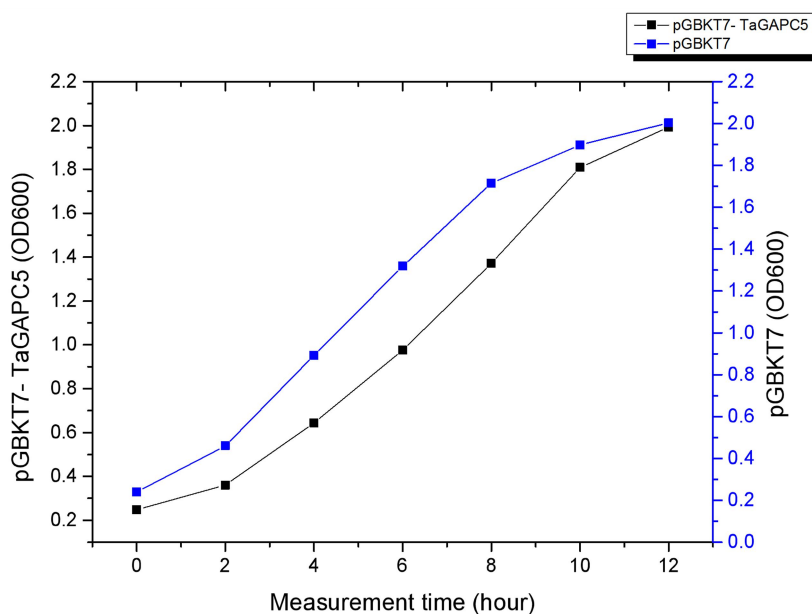

**Fig. S2 Toxicity detection of pGBKT7-GAPCp1 against yeast.** Whether pGBKT7-GAPCp1 is toxic to yeast by concentration determination after liquid culture of yeast containing pGBKT7-GAPCp1 and pGBKT7, respectively

**Table S1. Names and sequences of primer**

| Primer name        | Sequences (5'→3')                               |
|--------------------|-------------------------------------------------|
| TaGAPCp1-F         | AGCCCGAATTCCTCCGGGGATCCGTATGGCCTATATGTTCAAGTATG |
| TaGAPCp1-R         | CCGCTGCAGGTCGACCGATCCTCGGAGGTGATCAGTGCTT        |
| qRT-PCR-F-TaGAPCp1 | CACCCGCTCCGCTCATTITG                            |
| qRT-PCR-R-TaGAPCp1 | AAGTGGCTCAATGTTCTCTGG                           |
| β-actin-F          | CGACTCTGGTGATGGTGTGAG                           |
| β-actin-R          | AGCAAGGTCCAAACGAAGGA                            |

|                   |                                             |
|-------------------|---------------------------------------------|
| 1302-F            | ACGGGGGACTCTTGACCATGGATGGCCTATATGTTCAAGTATG |
| 1302-R            | TACTAGTCAGATCTACCATGGGTGCTTGGCGGAGACAAGAGC  |
| N-TaGAPCp1-F      | CCCAGGCCTACTAGTGGATCCATGGCCTATATGTTCAAGTATG |
| N-TaGAPCp1-R      | ACCCTCGAGGTCGACGGATCCTCGGAGGTGATCAGTGCTT    |
| C-Cyt b6f-F       | TGGCGCGCCACTAGTGGATCCATGGCCTCTACCGCGCT      |
| C-Cyt b6f-R       | GACAGTACTATCGATGGATCCTTTCCACCACGGGTGTGTC    |
| qRT-PCR-F-Cyt b6f | CACCGCCTCCAACCCTA                           |
| qRT-PCR-R-Cyt b6f | GGCCATGCAGGTGATGTT                          |

**Table S2. Gene CDS sequence**

*TaGAPCp1* cds (Traes\_6AS\_D1274A812.1) :

ATGGCCTATATGTTCAAGTATGACTCCACTCATGGCCCCTTTAAAGGATCCATCAATGT  
TGTGGATGATTCAACCCTGGAGATCAATGGGAAGAAAATCACTATAACAAGCAAAAG  
AGATCCCGCAGAGATTCCTTGGGGTAACTTTGGAGCTGACTATGTTGTTGAATCTTCTG  
GTGTTTTTACAACCATCGATAAAGCATCGGTACACTTGAAGGGTGGTGCTAAGAAAGT  
GGTGATATCTGCTCCATCCGCAGATGCTCCCATGTTTGTGGTTGGAGTAAATGAGATGA  
GCTACGATCCCAAGATGAATGTTGTTTCTAATGCAAGTTGTACCACTAACTGTCTTGCT  
CCTCTTGCCAAGGTTGTTTCATGAAGAATTTGGCATTCTTGAAGGTCTAATGACAACCTGT  
TCACGCCACAACAGCCACCCAAAAGACTGTTGATGGTCCTTCAATGAAAGATTGGAGA  
GGAGGGCGTGGTGCTGGTCAAAACATAATTCCTAGCTCCACTGGTGCAGCAAAGGCTG  
TTGGGAAAGTTCTCCCTGAGCTAAATGGAAAGCTTACTGGCATGGCTTTCCGAGTTCCA  
ACACCAAATGTCTCTGTGGTTGACTTGACCTGCCGGCTTGAGAAAAGTGCCTCTTATGA  
TGATGTGAAAGCAGCCATCAAGGCGGCATCAGAGGGTGCCTGAAAGGCATTTTAGG  
CTACACAGATGAGGATGTGGTATCCAACGATTTTGTGGTGACACAAGGTCAAGTGTA  
TTTGATGCTAATGCTGGCATGGGGCTGAGCTCTTCTTCATGAAGCTCGTGTCTGGTA  
CGACAACGAGTGGGGCTACAGCAACCGGGTCTTGATCTCATCGCCCACATGGCTCTT  
GTCTCCGCCAAGCACTGA

*Cyt b6f* cds (XM\_020345741.1)

ATGGCCTCCACCGCGCTCTCCACCGCCTCCAACCCTACCCAGCTCTGCCGGACCCGCG  
CAAGCTCGCTGTGCAAGCCCGTCAAGGGCCTGGGCTTCGGCCGGGAGCGCGTCCCGAG  
GAACATCACCTGCATGGCCGGCAGCATCTCCGCGGACCGCGTGCCGGACATGAGCAA  
GAGGGAGCTGATGAACCTGCTCCTGCTGGGCGCCATCTCGCTCCCCACCTTCGGCATG  
CTCGTCCCCTACGGCTCCTTCTCGTCCCAGGGCTCCGGGAGCAACGCCGGAGGGG  
TCGCCGCAAGGACAAGCTCGGCAACGACATCCTCGTCGAGGACTGGCTCAAGACGC  
ACGGCCCCAACGACCGCACGCTCGCCAGGGGCTCAAGGGTGATCCTACCTACCTTGT  
GGTGGAGTCCGACAAGACCCTCGCCACCTACGGGATCAACGCCGTGTGCACGCATCTT  
GGATGCGTCTGTGCCGTGGAACGCCGCGGAGAACAAGTTCCTCTGCCCCTGCCATGGAT  
CCCAGTACAACAACCAGGGCAAGGTTGTCCGTGGGCTGCACCTCTGTCTGCTGGCCCT  
TGTTACGCCGACGTCGACGACGGCAAGGTCGTCTTCGTGCCGTGGGTGGAGACCGAC  
TTCAGGACCGGCGACAACCCGTGGTGAAATAA

## Tauschii Dormancy-Associated Protein Homolog cds (GenBank XM\_020318726.1)

ATGGGGCTCCTCGACCAGCTCTGGGACGAGACGGTCGCCGGCCCCAGGCCGGACCAC  
GGCCTCGGCAGGCTCCGCAAGTACTCCTCCTTCTCGCCCTCGACCGCGGCGGCCACGG  
ACGTCGCGCCGGCGGTGACCCGCAGCATCACCATCGCCCCGGCCGCGCCATCTCTCTCGGT  
GCCATCTGGGAATCAAGCTCCTTGCCGCCGTCCCCGGCCAGCGCGCCGGACTCCCCG  
TTCGCAGCAGCTACCAGTAGGAGGGACGGCTGGAGGGCGTTCAGGCGGAAATCCAAG  
ATGGCCAACGTGACGTGTCGCGCCTGAGACGGCCGTCCGGGCCAGAAAGCCCCACC  
GTGTACGACTGGGTGGTGATCAGTTCATTGGACCGATGA

## Tauschii ATP-Dependent Clp Protease Proteolytic subunit cds (GenBank XM\_020331538.1)

ATGGCCATCCCCACGGCCCTCGCCGTCCGCGCCTCTCCCTCCTGCCAATTCTCGCACAG  
TTCGTCTTTGCTGCTCTCCTTTGTCTAGGCGGAATGGAAGCAGTGCATCTCGGCGCCT  
CCGAGGACTGCAAGTTTTAACATCAGGTGTTTCTGCACGGTTGGATGAGAGGATACAC  
AGTCAATCTTATCCGAGGAAAATACAATCGTGGCATCAGAGAATGAAAATCCACCTT  
TAATGCCTGCTATCATGACTCCTGGTGGCCCTCTGGATCTGGCAACCGTACTGCTAGGA  
AACCGTATAATCTTCATTGGTCAATATGTTAACTCGCAAGTGGCACAACGTGTGATATC  
ACAGCTTGTCACTTTCTGCTATAGATGAAGAGGGTGATATTCTGATCTATCTTAACT  
GCCCTGGCGGAAGTCTCTATTCTATCTTAGCAATTTATGATTGCATGTCCTGGATCTCAC  
CAAAGTTGGGACAGTGTGCTTTGGTGTGTTGCTAGTCAAGCAGCAATCATTCTTGCT  
GGTGGTGAGAAGGGGATGCGCTATGCGATGCCTAATGCCAGAGTAATGATTCATCAGC  
CTCAAGGTGGATCGGAGGGTAATACGGAGGAGGTGAGGAGACAGGTTGGGGAAACC  
ATTTATGCTCGAGATAAAGTTGACAAAATGTTTGCTTCTTTCACGGGGCGACCCATCGA  
TATAGTGCAGAGTGGACAGAGAGGGATCGTTTCATGTGTCGTCCGAGGCCATGGAC  
TTCGGACTAGTCGACGCATTGCTGGAAACGGGATGCTAA

Tauschii Ribulose-1,5-Bisphosphate Carboxylase (*RUBP*) cds (GenBank KT288199.1)

ATGGCCCCACCGTGATGGCCTCGTCGGCCACCTCCGTCGCTCCTTTCCAGGGGCTCAA  
GTCCACCGCCGGCCTCCCCGTCAGCCGCGCTCCAACGGCGCTAGCCTCGGCAGCGTC  
AGCAACGGTGGAAGGATCAGGTGCATGCAGGTGTGGCCATCGAGGGCATCAAGAAG  
TTCGAGACCCTGTCTTACCTGCCACCGCTCAGCACGGAGGCCCTCCTCAAGCAGGTGCG  
ACTACCTGATCCGCTCCAAGTGGGTGCCTTGCCTCGAGTTCAGCAAGGTTGGGTTTCATC  
TTCCGTGAGCACAACGCATCTCCTGGGTACTACGATGGCCGGTATTGGACAATGTGGA  
AGCTGCCTATGTTCCGGGTGCACTGACGCCACACAGGTGATCAACGAGGTGGAGGAGGT  
CAAGAAGGAGTACCCTGACGCGTATGTCCGCATCATCGGATTCGACAACATGCGTCAG  
GTGCAGTGCCTCAGCTTCATCGCCTTCAAGCCACCGGGCTGCGAGGAGTCCGGCAAGG  
CCTAA

Tauschii GATA Transcription Factor (*GATA*) cds (GenBank XM\_020324318.1)

ATGGATTCGTCTACCACAAGGTGATCGGGGTCGCTCCGGCGGCGGCGGAGGGAGGG  
AGGATGTGCTGCGTCAATGCCGACACCACCACCTCCCATGTGGCGCAGCGGGCCAA  
CGGGGCCGAGGACGCTTTGCAACGCGTGCGGGATCCGATACAGGAAGAAGAGGAGGC

AAGAGCTAGGTCTCGACAACAAGCCGCAGAACCAGCAGCTGAACCAACAACAACAA  
CAGCAGCAGCAGCAGCAACAACAACAACAACAAGAAGATCACGGAGAGGCCAA  
CAAGTGCAGTAAAAGACAGCAGCAGCAGTACCAACAACAAAAGCAACAGTCTCCAA  
GTGGTGAAGAAGAAAAGGACGGTCTCAATGGGGGTGGAGGAGGCTGCATTCTTGCTC  
ATGGCCTTGTCCTCCTCATCTACACCCCACTACTACATGGCTGA

Tauschii Probable E3 Ubiquitin-Protein Ligase cds (GenBank XM\_020328679.1)

ATGTCAGGAGGTCCGCAGACATATTGGTGCTTCCAGTGTAGACAGCGGGTTAGGCCGC  
GTGGACGGGAGATGGAGTGTCTTACTGTGATGCTGGCTTTGTGGCTGAAATGGATGAT  
GTCGATGCTCTCATGAGCCAATTTGTTGGGATGTATAGTGATTTTCATCGTGACCCAAG  
GTTCCGGATCATGGAGGCAATGTCTACCGTGATGCGACATGGAATGGGGAGCATGAAT  
CGAGAGGCTGATGTAAGAGGAAGGCCAAGCATATTATCTGACCTGGAGACGGAATTT  
GGTTCAGGGCCATGGTTGCTCTTCCGTGGCCAGCTCCCCGGTCATCTCTCAGAGGCCAA  
TAGTGGTTTCGACGTTTTTCGTCAATGGACGCCGTGGTGTGGCATGCGGAGGGCAGATG  
TTGCAGATTACTTTGTTGGCCTGGATTGGAAGATCTGATTGAGCAGTTGACTCATAAT  
GATCGTCGAGGGCCACCACCTGCCTCTCAGTCATCGATTGATGCCATGCCTAGTGTTAG  
GATCACTGCCAGGCATCTCACTGGAGACTCGCATTGCCCTGTCTGCAAGGACAAGTTT  
GAACTGGGATCAGAAGCAAGAGAGATGCCATGCAAGCATTTATAACCACTCTGATTGCA  
TACTTCCTTGGCTAGAGCAACACAATTCCTGTCTGTTGCCGATATGAGCTGCCACA  
CAGAGCTCTAGTGGTGCCAGCTGCTCACGCTCAAGATCAACCAACCAAAATGACAGTT  
CAAGCAGCTCAAGTAGCAGTGGGAGAACCAGCGGGCGTCAGAGGAGAAGGAACCCG  
TTCTCGTTCCTATGGCCTTTCCGCTCATCAAGTTCTAGCACTGGTTCTCGTTAG

Tauschii Protein *SGT1* cds (GenBank KJ907387.1)

ATGGCCGCCGCCGCCGCGTCGGATCTGGAGAGCAAGGCCAAGGAGGCCTTCGTGCAC  
GACGACTTCGAGCTGGCCGCCGAGCTCTACACCCAGGCCATTGAGGCGGGGCCGCC  
ACCGCGGAACTCTACGCCGACCGAGCCCAGGCGCACATCAAGCTGGGCAGTTACACT  
GAGGCTGTAGCTGATGCCAACAAAGCAATTGAACTTGATCCTTCGATGCATAAAGCAT  
ACCTTCGGAAGGGCTCTGCTTGCATCAAGCTGGAGGAATACCAAAGTGCAAAGGCTGC  
TCTTGAAGTGGTTCTTCATATGCATCTGGTGACTCGAGGTTTACTCGTCTGATGAAGG  
AGTGTGATGATCGTATTGCTGAGGAGGCTAGCCAGGTGCCAGTAAAGAATGCCGCTGC  
AGCTGTTGCTCCAGCTACATCTTCGGGGGCATCTTCCGGGGCTACAAGTGTGGCTACTG  
AAGTTGAGGACCAGGATGGTGCAAATATGGAGAATGCACAGCCAACGGTAGAAGTGC  
CAAGCAAGCCCAAATACAGGCATGACTACTACAATACTCCTACAGAAGTGGTACTGA  
CTATATTTGCTAAGGGTGTTCAGCTGACAGCGTGGTTGTTGACTTTGGTGAACAGATG  
CTGAGTGTCTCAATTGAACTTCCCGGTGAGGAACCATAACATTTTCAGCCTCGTCTGTTT  
TCAAAGATCGTCCCAGATAAGTGCAAGTATACTGTGTTGTCTACAAAGGTTGAAATGC  
GCCTTGCAAAGCTGAGCCAGTAACTTGGACATCATTGGATTATACTGGTAAACCAAA  
GGCTCCTCAGAAGATAAATGTACCAGCTGAATCAGCCCAGAGGCCATCTTATCCATCA  
TCAAAATCCAAAAGGACTGGGATAAGCTTGAAGCTGAAGTGAAAAACAGGAGAA  
GGATGAAAAACTTGATGGCGATGCTGCATTGAACAAATTTTTCCGTGAAATTTACAGT  
GATGCTGATGAAGATATGCGTAGAGCAATGATGAAGTCTTTTGTGGAGTCTAATGGAA

CCGTTCTCTCAACCAACTGGAAGGATGTCGGGAAAAAGACGGTTGAAGGAAGCCCTC  
CTGATGGAATGGAGCTCAAGAAGTGGGAGTATTAA

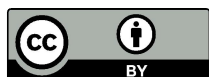

© 2019 by the authors. Licensee MDPI, Basel, Switzerland. This article is an open access article distributed under the terms and conditions of the Creative Commons Attribution (CC BY) license (<http://creativecommons.org/licenses/by/4.0/>).
